# Supplementary material
Source: publisher figshare collection journal article supplement (https://plos.figshare.com/ndownloader/files/15171452)
Supplement: Supplementary file [file 15171452]

|                                     |                                                                          |                       |                         |                    |
|-------------------------------------|--------------------------------------------------------------------------|-----------------------|-------------------------|--------------------|
| Domain of domestic chores           | mean (SD): 11.4 (5.7)<br>median (Q1-Q3): 12.5 (8-16.75)<br>min-max: 0-18 |                       |                         |                    |
|                                     | Never                                                                    | Under once weekly     | 1-2 times a week        | Most days          |
| Preparing meals                     | 93 (31.4%)                                                               | 7 (2.4%)              | 70 (23.6%)              | 126 (42.6%)        |
| Washing dishes                      | 53 (17.9%)                                                               | 6 (2%)                | 63 (21.3%)              | 174 (58.8%)        |
|                                     | Never                                                                    | 1-2 times in 3 months | 3-12 times in 3 months  | At least weekly    |
| Washing clothes                     | 125 (42.2%)                                                              | 9 (3%)                | 43 (14.5%)              | 119 (40.2%)        |
| Light housework                     | 111 (37.5%)                                                              | 7 (2.4%)              | 51 (17.2%)              | 127 (42.9%)        |
| Heavy housework                     | 98 (33.1%)                                                               | 9 (3%)                | 34 (11.5%)              | 155 (52.4%)        |
| Local shopping                      | 56 (18.9%)                                                               | 3 (1%)                | 11 (3.7%)               | 226 (76.4%)        |
| Domain of Work/Leisure              | mean (SD): 12.7 (6.0)<br>median (Q1-Q3): 13 (8-17)<br>min-max: 0-26      |                       |                         |                    |
|                                     | Never                                                                    | 1-2 times in 3 months | 3-12 times in 3 months  | At least weekly    |
| Social outings                      | 78 (26.4%)                                                               | 52 (17.6%)            | 79 (26.7%)              | 87 (29.4%)         |
| Walks                               | 63 (21.3%)                                                               | 5 (1.7%)              | 9 (3%)                  | 219 (74 %)         |
| Hobby/Sport                         | 128 (43.2%)                                                              | 7 (2.4%)              | 13 (4.4%)               | 148 (50%)          |
| Driving a car/<br>Travel on bus     | 55 (18.6%)                                                               | 19 (6.4%)             | 31 (10.5%)              | 191 (64.5%)        |
|                                     | Never                                                                    | 1-2 times in 6 months | 3-12 times in 6 months  | At least weekly    |
| Outings/ Car rides                  | 62 (20.9%)                                                               | 89 (30.1%)            | 107 (36.1%)             | 38 (12.8%)         |
|                                     | None                                                                     | Light                 | Moderate                | All necessary      |
| Gardening                           | 177 (59.8%)                                                              | 35 (11.8%)            | 34 (11.5%)              | 50 (16.9%)         |
| Household and/or<br>Car maintenance | 186 (62.8%)                                                              | 35 (11.8%)            | 49 (16.6%)              | 26 (8.8%)          |
|                                     | None                                                                     | 1 in 6 months         | Less than 1 a fortnight | Over 1 a fortnight |
| Reading books                       | 120 (40.5%)                                                              | 52 (17.6%)            | 56 (18.9%)              | 68 (23%)           |
|                                     | None                                                                     | Up to 10 h/week       | 10-30 h/week            | Over 30 h/week     |
| Gainful work                        | 205 (69.3%)                                                              | 6 (2%)                | 34 (11.5%)              | 51 (17.2%)         |
| Summary score                       | mean (SD): 24.1 (10.3)<br>median (Q1-Q3): 27 (18.25-32)<br>min-max: 0-44 |                       |                         |                    |

Each item rated on a 0-3 scale representing lowest to highest actual participation in each activity  
Proportions shown as n (%)
